# Supplementary material for: Accuracy for Mortality Prediction With Additive Biomarkers Including Interleukin-6 in Critically Ill Patients: A Multicenter Prospective Observational Study
Source: PubMed Central journal article supplement — Crit Care Explor. 2021 Apr 26;3(4):e0387. doi: 10.1097/CCE.0000000000000387 (PMC8078448; doi:10.1097/cce.0000000000000387), 2021-04-26
Supplement: cc9-3-e0387-s002.pdf [file cc9-3-e0387-s002.pdf]

**Table S1** Serum concentration of biomarkers and mortality prediction

|                                    |       | Survivor (n =143) | Non-survivor (n = 18) | <i>p</i> (univariate) | AUROC* | 95% CI      | <i>p</i> (AUROC) |
|------------------------------------|-------|-------------------|-----------------------|-----------------------|--------|-------------|------------------|
| IL-6, pg/ml, median(IQR)           | Day 0 | 352 (145–2437)    | 2467 (164–13961)      | 0.094                 | 0.585  | 0.431–0.738 | 0.250            |
|                                    | Day 1 | 131 (56–787)      | 1319 (113–9339)       | 0.003                 | 0.677  | 0.543–0.811 | 0.016            |
|                                    | Day 2 | 91 (39–222)       | 176 (139–1206)        | <0.001                | 0.722  | 0.611–0.832 | 0.003            |
|                                    | Day 3 | 59 (29–144)       | 297 (106–1042)        | <0.001                | 0.766  | 0.656–0.876 | <0.001           |
| CRP, mg/dl, median(IQR)            | Day 0 | 10.3 (0.7–22.0)   | 5.5 (1.9–20.8)        | 0.964                 | 0.442  | 0.302–0.582 | 0.431            |
|                                    | Day 1 | 12.0 (7.0–23.7)   | 8.9 (5.3–18.1)        | 0.266                 | 0.380  | 0.240–0.519 | 0.102            |
|                                    | Day 2 | 15.5 (9.2–22.7)   | 14.3 (6.8–20.4)       | 0.372                 | 0.421  | 0.280–0.563 | 0.285            |
|                                    | Day 3 | 12.2 (6.6–18.0)   | 15.2 (6.9–21.2)       | 0.456                 | 0.547  | 0.393–0.701 | 0.526            |
| PCT, ng/ml, median(IQR)            | Day 0 | 1.8 (0.3–8.8)     | 4.8 (0.6–36.7)        | 0.167                 | 0.549  | 0.405–0.692 | 0.508            |
|                                    | Day 1 | 3.1 (0.8–19.8)    | 7.0 (2.5–23.6)        | 0.233                 | 0.529  | 0.392–0.665 | 0.699            |
|                                    | Day 2 | 2.4 (0.7–14.6)    | 6.9 (1.7–19.1)        | 0.097                 | 0.560  | 0.426–0.694 | 0.415            |
|                                    | Day 3 | 1.6 (0.5–7.5)     | 4.8 (1.3–9.9)         | 0.058                 | 0.576  | 0.447–0.704 | 0.304            |
| IL-8, pg/ml, median(IQR)           | Day 0 | 74 (23–267)       | 497 (36–3985)         | 0.018                 | 0.630  | 0.480–0.780 | 0.078            |
|                                    | Day 1 | 38 (12–113)       | 212 (34–2890)         | 0.004                 | 0.669  | 0.525–0.814 | 0.021            |
|                                    | Day 2 | 23 (11–75)        | 85 (22–289)           | 0.005                 | 0.659  | 0.523–0.814 | 0.031            |
|                                    | Day 3 | 20 (9–47)         | 38 (22–139)           | 0.008                 | 0.654  | 0.527–0.781 | 0.037            |
| IL-10, pg/ml, median(IQR)          | Day 0 | 10 (3–45)         | 13 (4–210)            | 0.421                 | 0.610  | 0.416–0.805 | 0.247            |
|                                    | Day 1 | 4 (2–11)          | 13 (3–74)             | 0.025                 | 0.689  | 0.519–0.858 | 0.048            |
|                                    | Day 2 | 2 (2–5)           | 7 (2–23)              | 0.032                 | 0.754  | 0.573–0.935 | 0.008            |
|                                    | Day 3 | 2 (2–5)           | 6 (3–12)              | 0.001                 | 0.711  | 0.529–0.893 | 0.027            |
| TNF- $\alpha$ , pg/ml, median(IQR) | Day 0 | 3.7 (1.5–8.4)     | 6.1 (2.4–9.5)         | 0.104                 | 0.556  | 0.425–0.686 | 0.451            |
|                                    | Day 1 | 3.3 (1.8–5.8)     | 4.4 (2.4–9.5)         | 0.209                 | 0.532  | 0.386–0.678 | 0.666            |
|                                    | Day 2 | 2.9 (2.0–4.7)     | 3.6 (2.4–5.4)         | 0.133                 | 0.544  | 0.419–0.670 | 0.546            |

---

|       |               |               |       |       |             |       |
|-------|---------------|---------------|-------|-------|-------------|-------|
| Day 3 | 2.7 (1.7–4.1) | 3.4 (2.4–5.3) | 0.071 | 0.570 | 0.438–0.702 | 0.344 |
|-------|---------------|---------------|-------|-------|-------------|-------|

---

AUROC = area under the receiver operating characteristic (ROC) curve, CI = confidence interval, IL = interleukin, CRP = C-reactive protein, PCT = procalcitonin, TNF = tumor necrosis factor. \*AUROC was calculated from ROC curve that was drawn for log-transformed values of biomarker levels according to 28-day mortality.
