# Supplementary material for: Accuracy for Mortality Prediction With Additive Biomarkers Including Interleukin-6 in Critically Ill Patients: A Multicenter Prospective Observational Study
Source: PubMed Central journal article supplement — Crit Care Explor. 2021 Apr 26;3(4):e0387. doi: 10.1097/CCE.0000000000000387 (PMC8078448; doi:10.1097/cce.0000000000000387), 2021-04-26
Supplement: cc9-3-e0387-s003.pdf [file cc9-3-e0387-s003.pdf]

**Table S2** ICU-free days and additive biomarkers

|                        | Coefficient (days) | 95% CI     | <i>p</i> value |
|------------------------|--------------------|------------|----------------|
| IL-6 at Day 3          | -2.4               | -4.7, -0.1 | 0.042          |
| CRP at Day 3           | 0.8                | -2.3, 3.9  | 0.608          |
| PCT at Day 3           | 1.6                | 0.1, 3.3   | 0.034          |
| IL-8 at Day 1          | 0.3                | -1.5, 2.1  | 0.762          |
| IL-10 at Day 2         | -1.6               | -5.4, 2.3  | 0.418          |
| TNF- $\alpha$ at Day 3 | 3.2                | -1.2, 7.6  | 0.157          |

ICU = intensive care unit, CI = confidence interval, IL = interleukin, CRP = C-reactive protein, PCT = procalcitonin, TNF = tumor necrosis factor. \* Log-transformed biomarker levels were entered along with SOFA score at Day 2 in the linear regression analysis.
