# Supplementary figures and images for: Accuracy for Mortality Prediction With Additive Biomarkers Including Interleukin-6 in Critically Ill Patients: A Multicenter Prospective Observational Study
Source: PubMed Central journal article supplement — Crit Care Explor. 2021 Apr 26;3(4):e0387. doi: 10.1097/CCE.0000000000000387 (PMC8078448; doi:10.1097/cce.0000000000000387), 2021-04-26

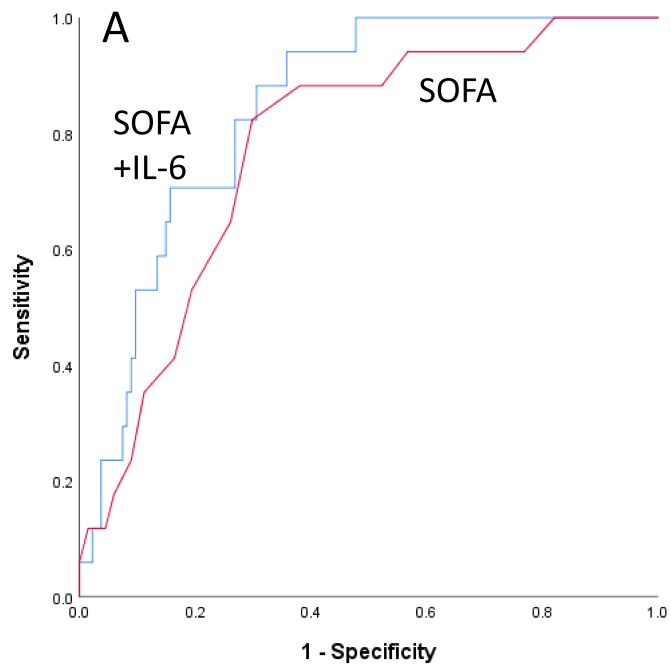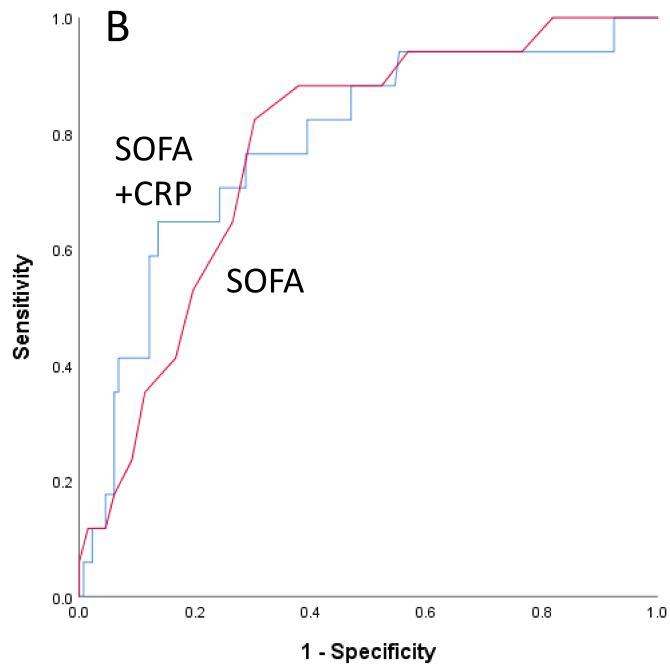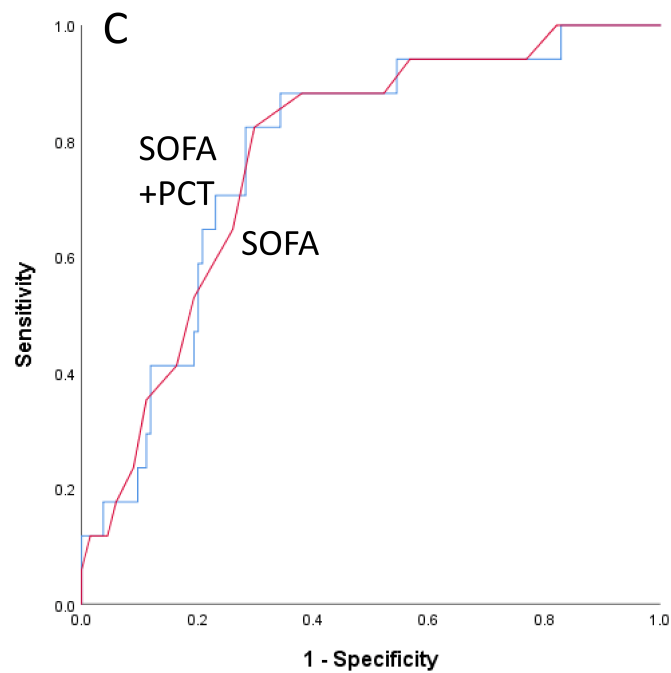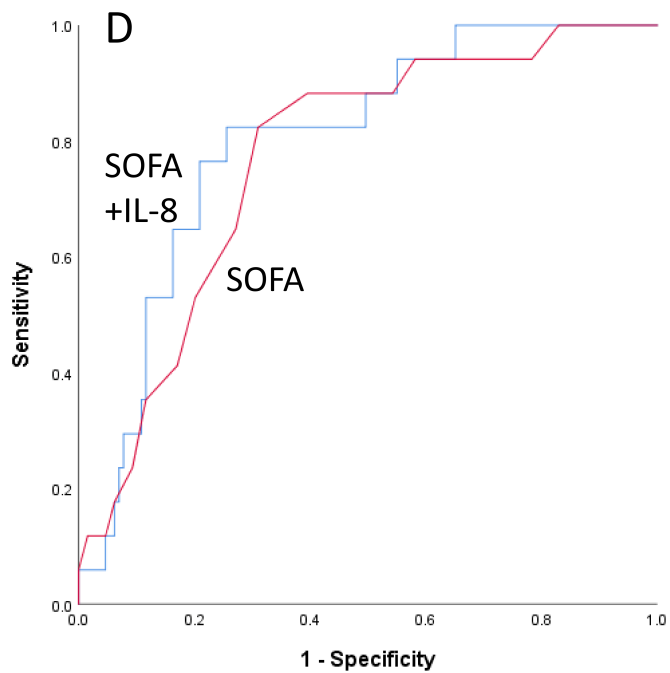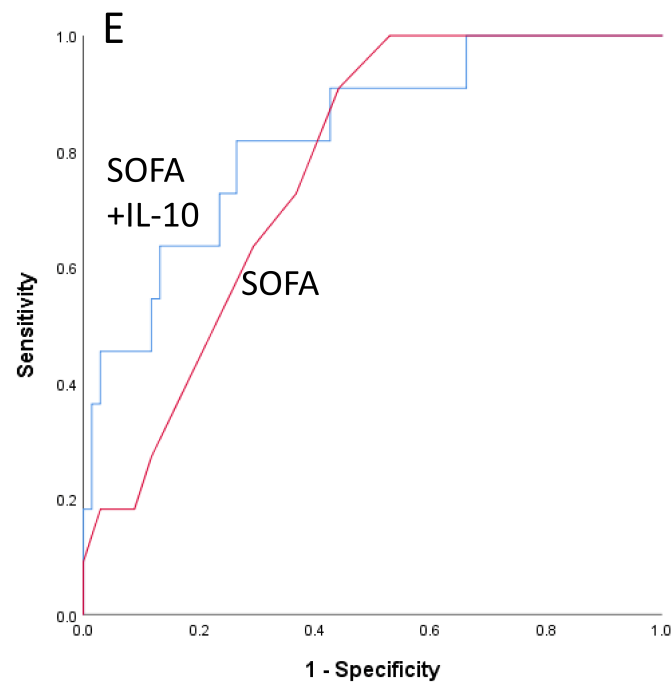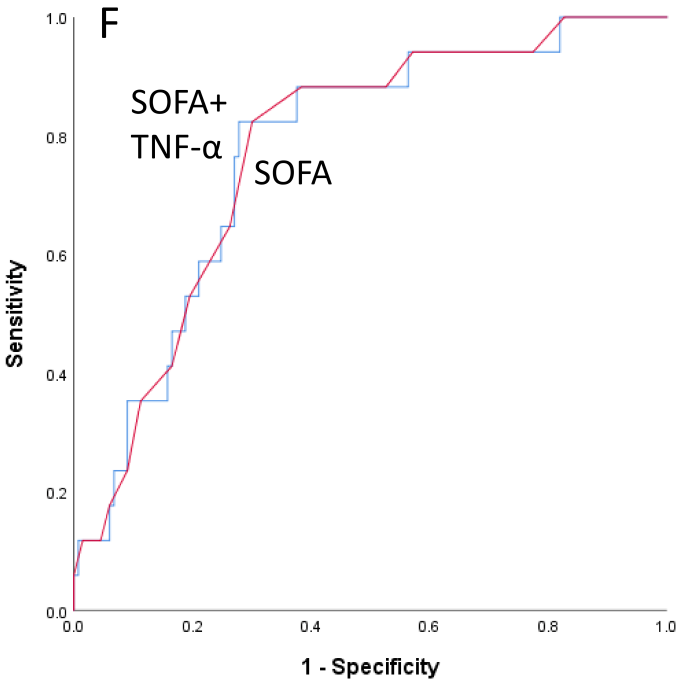

Supplement: cc9-3-e0387-s001.pdf [file cc9-3-e0387-s001.pdf]
